# Supplementary material
Source: publisher site journal article supplement (https://www.kjim.org/upload/media/kjim-2019-292-suppl4.pdf)
Supplement: Supplementary file 1 [file kjim-2019-292-suppl4.pdf]

**Supplementary Table 3. Risk factors for poor medical compliance (1-year MPR < 95%) for calcineurin inhibitor**

| Variable                     | Univariable      |         | Multivariable-backward elimination |         |
|------------------------------|------------------|---------|------------------------------------|---------|
|                              | OR (95% CI)      | p value | Adjusted OR (95% CI)               | p value |
| Age, yr                      |                  |         |                                    |         |
| < 30                         | Reference        |         |                                    |         |
| ≥ 30 and < 60                | 1.35 (1.05–1.75) | 0.02    |                                    |         |
| > 60                         | 0.84 (0.64–1.11) | 0.23    |                                    |         |
| Male sex (vs. female sex)    | 0.97 (0.82–1.15) | 0.74    |                                    |         |
| Previous dialysis            |                  |         |                                    |         |
| Pre-emptive                  | Reference        |         |                                    |         |
| Hemodialysis                 | 0.72 (0.55–0.93) | 0.01    | 0.71 (0.54–0.92)                   | 0.01    |
| Peritoneal dialysis          | 0.81 (0.67–0.98) | 0.03    | 0.79 (0.66–0.96)                   | 0.02    |
| Both or other                | 0.93 (0.59–1.49) | 0.75    | 1.09 (0.69–1.71)                   | 0.72    |
| Hypertension (vs. none)      | 0.68 (0.52–0.89) | 0.006   | 0.80 (0.68–0.94)                   | 0.03    |
| Diabetes mellitus (vs. none) | 0.90 (0.74–1.09) | 0.27    |                                    |         |
| Era                          |                  |         |                                    |         |
| 2006–2008                    | Reference        |         | Reference                          |         |
| 2009–2011                    | 0.91 (0.75–1.11) | 0.37    | 0.94 (0.77–1.15)                   | 0.54    |
| 2012–2013                    | 0.40 (0.32–0.51) | < 0.001 | 0.41 (0.32–0.52)                   | < 0.001 |

MPR, medication possession ratio; OR, odds ratio; CI, confidence interval.
